# A novel approach to the functional classification of retinal ganglion cells

Abbreviated title: DREADD for RGC classification

Gerrit Hilgen<sup>1,2\*</sup>, Evgenia Kartsaki<sup>1,3</sup>, Viktoriia Kartysh<sup>1,4,5</sup>, Bruno Cessac<sup>3</sup>, Evelyne Sernagor<sup>1\*</sup>

<sup>1</sup> *Biosciences Institute, Newcastle University, Newcastle upon Tyne, UK*

<sup>2</sup> *Health & Life Sciences, Applied Sciences, Northumbria University, Newcastle upon Tyne UK*

<sup>3</sup> *Université Côte d'Azur, Inria, Biovision team and Neuromod Institute, Sophia Antipolis Cedex, F*

<sup>4</sup> *Ludwig Boltzmann Institute for Rare and Undiagnosed Diseases (LBI-RUD), 1090 Vienna, AT*

<sup>5</sup> *Research Centre for Molecular Medicine (CeMM) of the Austrian Academy of Sciences, 1090 Vienna, AT*

\* Corresponding author: [gerrit.hilgen@ncl.ac.uk](mailto:gerrit.hilgen@ncl.ac.uk); [evelyne.sernagor@ncl.ac.uk](mailto:evelyne.sernagor@ncl.ac.uk)

Financial interests or conflicts of interest: The authors declare no competing financial interests

## 1 Abstract

2 Retinal neurons are remarkably diverse based on structure, function and genetic identity.  
3 Classifying these cells is a challenging task, requiring multimodal methodology. Here, we  
4 introduce a novel approach for retinal ganglion cell (RGC) classification, based on  
5 pharmacogenetics combined with immunohistochemistry and large-scale retinal  
6 electrophysiology. Our novel strategy allows grouping of cells sharing gene expression and  
7 understanding how these cell classes respond to basic and complex visual scenes. Our  
8 approach consists of several consecutive steps. First, the spike firing frequency is increased  
9 in RGCs co-expressing a certain gene (*Scnn1a* or *Grik4*) using excitatory DREADDs  
10 (Designer Receptors Exclusively Activated by Designer Drugs) in order to single out activity  
11 originating specifically from these cells. Their spike location is then combined with *post hoc*  
12 immunostaining, to unequivocally characterize their anatomical and functional features. We  
13 grouped these isolated RGCs into multiple clusters based on spike train similarities. Using this  
14 novel approach, we were able to extend the pre-existing list of *Grik4* expressing RGC types  
15 to a total of 8 and, for the first time, we provide a phenotypical description of 13 *Scnn1a*-  
16 expressing RGCs. The insights and methods gained here can guide not only RGC  
17 classification but neuronal classification challenges in other brain regions as well.

18

## 19 Keywords

20 DREADD, *Grik4*, *Scnn1a*, retinal ganglion cells, multielectrode array, classification

21

## 22 Introduction

23 The retina contains two types of photoreceptors, rods for dim light and cones for daylight and  
24 colour vision. Furthermore, cone-contacting bipolar cells can be divided into ON and OFF  
25 types and further subdivided into more than a dozen different subpopulations (1). These  
26 parallel processed channels are further divided into a variety of functional output channels,  
27 so-called retinal ganglion cells (RGCs), which encode different features of the visual

28 environment. There are ~1 million RGCs in humans and ~45,000 in mice (2,3), integrating the  
29 visual information processed from photoreceptors down the retinal neural network. Different  
30 types of RGCs extract very specific features from the visual scenery (4). This code is  
31 transmitted to postsynaptic targets in the brain, leading to visual perception. At present, more  
32 than 40 RGC types have been identified in the mouse retina (5,6). RGC classification is  
33 typically based on common anatomical features (7,8), responses to light (5,9–11) or on shared  
34 gene expression (6,12–14). Classification based on gene expression is relatively recent, and  
35 the majority of RGC groups sharing specific genes have not been phenotyped yet.

36

37 Current approaches for functional characterization of RGC subpopulations at pan-retinal scale  
38 are limited. Multielectrode arrays (MEAs) allow electrical recording from many RGCs  
39 simultaneously at high spatiotemporal resolution (15). Here we use a CMOS (complementary  
40 metal-oxide-semiconductor) MEA system consisting of 4,096 electrodes (2.67 x 2.67 mm  
41 arrays), allowing us to record light responses from hundreds to thousands of RGCs  
42 simultaneously at pan-retinal level and near cellular resolution (16,17). We selected two genes  
43 based on their sparse distribution across the RGC layer and their novelty for phenotypic  
44 characterization (Allen Mouse Brain Connectivity Atlas (2011)). *Grik4* (glutamate receptor,  
45 ionotropic, kainite subunit 4, HGNC: 4582) expressing RGCs have been partially described  
46 using a *Grik4* Cre mouse line (18). The other gene we investigated is *Scnn1a* (non-voltage  
47 gated sodium channel, epithelial 1 subunit alpha, HGNC:10599). *Scnn1a* Cre-induced  
48 recombination (*Scnn1a*-Tg3-Cre line) is present in sparse Layer 4 neurons, mostly in the  
49 somatosensory cortex (19). Current knowledge of *Scnn1a* expressing RGCs in the retina is  
50 limited to the fact that their dendritic arbour stratifies in sublamina S1 and S2 (OFF layers)  
51 and in sublamina S4 (ON layer) of the inner plexiform layer (13). Here, we used the Cre-Lox  
52 recombination approach to specifically express DREADDs in these two Cre-lines to further  
53 investigate these RGC types.

54 Designer Receptors Exclusively Activated by Designer Drugs (DREADDs) (20) technology is  
55 a powerful new approach to pharmacologically dissect out the role of specific neuronal cell  
56 classes in network activity (21,22). DREADDs are an engineered version of muscarinic  
57 metabotropic receptors that allow precise control of G-protein signalling pathways. They are  
58 activated by “designer drugs” that have no endogenous receptors in the organism, such as  
59 clozapine-N-oxide (CNO). Most commonly used DREADDs are excitatory (hM3Dq, triggering  
60 release of calcium from organelles, leading to increase in intracellular concentration of free  
61 calcium and to membrane depolarization) In this study, we have generated Cre recombinase-  
62 mediated restricted expression of cell-specific DREADD (23) expression in either *Grik4* or  
63 *Scnn1a* reporter lines. We characterized the *Grik4* and *Scnn1a* expression in RGCs and  
64 established an immunocytochemical atlas that is used to estimate the minimum cluster size  
65 for these cells. We have successfully isolated light-evoked responses in RGCs sharing either  
66 *Scnn1a* or *Grik4* gene expression by combining excitatory DREADD activation, large-scale  
67 retinal CMOS MEA recordings and *post hoc* labelling of DREADD-expressing RGCs. We  
68 grouped the RGC responses into multiple clusters based on the similarity of the spike trains  
69 they generate in response to a series of stationary stimuli, thus extending or unravelling RGC  
70 types for the *Scnn1a* and *Grik4* gene pool.

71

## 72 Results

73 To functionally validate RGC subgroups according to shared gene expression, we first  
74 established an immunocytochemical atlas of these cells. Building such a resource for *Grik4*  
75 and *Scnn1a* expressing cells in the mouse retina is important to estimate RGC numbers and  
76 types in these two genetic pools. We used the intrinsic fluorescence signal of *Grik4*-DREADD  
77 (hereafter named *Grik4*) and *Scnn1a*-DREADD (hereafter named *Scnn1a*) cells to provide a  
78 detailed IHC map of *Grik4* and *Scnn1a* expressing cells in retinal whole mounts and vertical  
79 sections. Each DREADD is tagged with hemagglutinin (HA) as well as mCitrine, allowing to  
80 visualize DREADD-expressing cells by immunofluorescence. We first investigated the

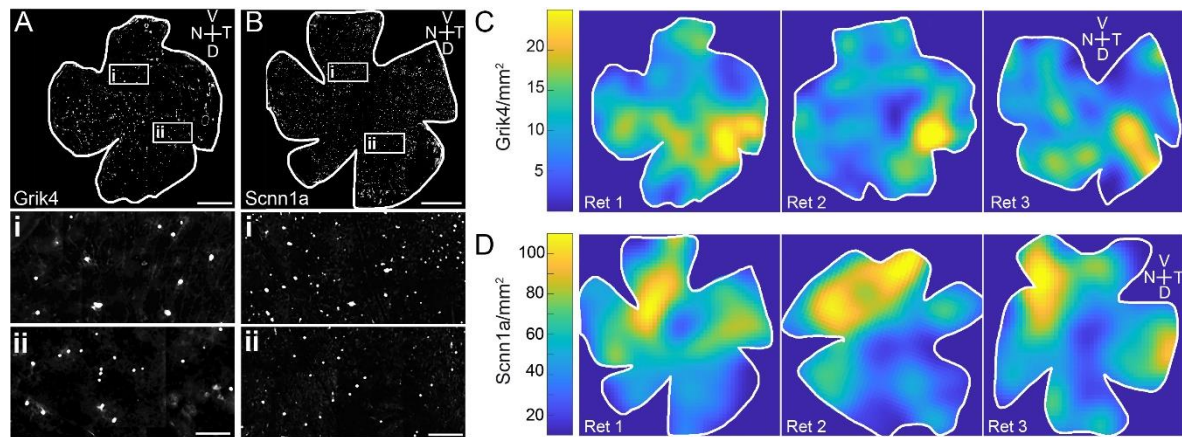

*Figure 1: Grik4 and Scnn1a cells in the GCL are not homogeneously distributed. Whole mount antibody staining against Grik4 (A) and Scnn1a (B) DREADD GFP were imaged at the level of the GCL. All stained GFP cells were counted and the densities were calculated and presented in pseudocolors for 3 Grik4 (C) and Scnn1a (D) retinas. V= ventral, T = temporal, D = dorsal, N = nasal. Scale bar A, B = 1 mm; Scale bar A, B insets II = 100  $\mu$ m.*

81 distribution of Grik4 and Scnn1a cells in the ganglion cell layer (GCL) in retinal whole mounts  
82 using an antibody against Green Fluorescent Protein (GFP) to amplify the intrinsic mCitrine  
83 signal (Fig 1). Both lines exhibit sparse cellular distribution in the GCL, with Scnn1a cells  
84 significantly more abundant than Grik4 (Fig 1 A, B insets I and II). We calculated the cell  
85 densities in the GCL of three representative Grik4 (Fig 1 C) and Scnn1a (Fig 1 D) retinas.  
86 Grik4 and Scnn1a cell densities respectively vary between 10-25 and 40-100 cells/mm<sup>2</sup>. Both  
87 pools exhibit non-even distributions. Grik4 cells are more prominent in the dorsal-temporal  
88 periphery (Fig 1 C, yellow areas), while Scnn1a cells are more prominent in the ventral-nasal  
89 periphery (Fig 1 D, yellow areas).

90

91 To establish an immunohistochemical atlas of Scnn1a and Grik4 RGCs in the GCL, retinal  
92 whole mounts (Fig 2) and vertical sections (Fig 3) were stained for GFP, the calcium-binding  
93 protein marker parvalbumin (Fig. 2 A, B) (24), calretinin (Fig 3 A, B) (25), as well as a selective  
94 marker for RGCs in the mammalian retina (RBPMS (26) Fig 3 C, D)). In a first set of  
95 experiments (Fig 2 A, B) we labelled respectively against GFP (cyan) and parvalbumin  
96 (magenta) in retinal whole mounts of Grik4 (Fig 2 A) and Scnn1a (Fig 2 B) to find out whether

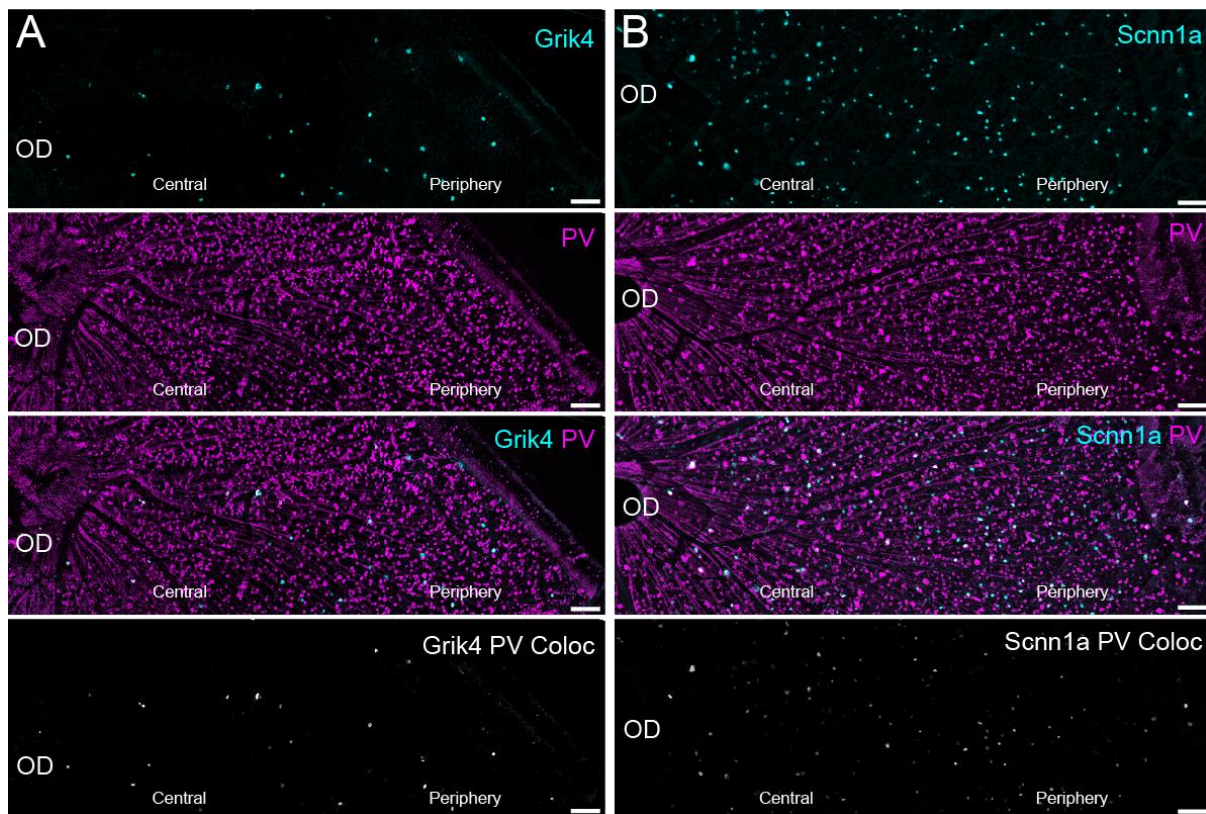

*Figure 2: A large fraction of Grik4 and Scnn1a cells is Parvalbumin positive. Whole mount antibody staining against Grik4 (A) and Scnn1a (B) DREADD GFP in combination with Parvalbumin (PV, magenta) revealed that a large fraction of the DREADD cells in the ganglion cell layer is expressing also Parvalbumin (middle and bottom). Bottom images show DREADD and PV image layers multiplied, thus revealing colocalised cells. Scale bars = 100  $\mu$ m.*

97 there are cells in these two pools that co-express parvalbumin. The pool of parvalbumin RGCs  
98 in the mouse consists of 8-14 well-described RGCs sub-types (5,24,27–29). Quantification (n  
99 = 2 whole mount retinas) revealed that in Gri4 retinas,  $6.6 \pm 4.6$  cells/ $\text{mm}^2$  cells are positive  
100 for parvalbumin in the central area, and  $9.2 \pm 11.2$  cells/ $\text{mm}^2$  are positive in the periphery (i.e.,  
101 approximately 50-65% of Grik4 cells are parvalbumin positive, Fig 2 A, bottom). For Scnn1a  
102 whole mounts (n = 2), we found  $24.6 \pm 10$  parvalbumin positive cells/ $\text{mm}^2$  in the centre and  
103  $38.7 \pm 13.6$  cells/ $\text{mm}^2$  in the periphery (i.e., 40 – 50%). Given that the retinas were not  
104 additionally stained for RBPMS (both antibodies were raised in the same species), and some  
105 subclasses of displaced ACs are parvalbumin-immunoreactive, the real fraction of  
106 parvalbumin-positive RGCs expressing DREADDs could not be fully estimated. In summary,

107 the number of DREADD GFP/parvalbumin cells is over 40% and higher in the periphery. NB  
108 the cardinal direction information was not noted for these experiments.

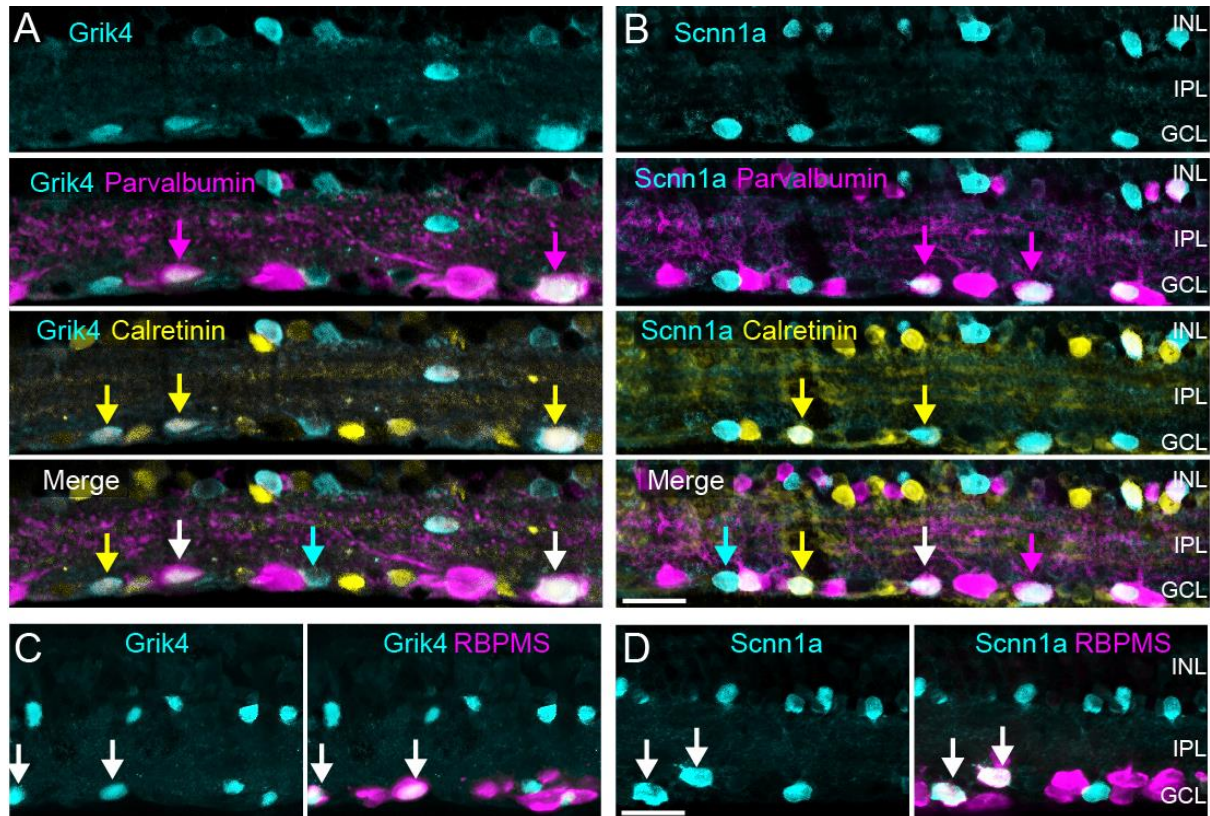

Figure 3: *Grik4* and *Scnn1a* DREADD are expressed in multiple RGC types. Vertical sections of *Grik4* and *Scnn1a* retinas were triple stained A, B) for GFP (cyan), Parvalbumin (magenta) and Calretinin (yellow) or C, D) GFP (cyan) and RBPMS (magenta). INL = inner nuclear layer, IPL = inner plexiform layer, GCL = ganglion cell layer. Scale bar in B, D = 20  $\mu$ m.

109 Our initial findings indicate that a large fraction of DREADD cells in the periphery of the GCL  
110 are parvalbumin positive. The next experiments thus aimed to find out whether these  
111 DREADD-expressing cells can be further subdivided into smaller groups. Besides  
112 parvalbumin, the expression of calretinin, another calcium-binding protein, is well described in  
113 RGCs (25). Hence, we triple-labelled vertical sections (Fig 3 A, B) for GFP (cyan), calretinin  
114 (yellow) and parvalbumin (magenta). We found that the population of *Grik4* (Fig 3 A) and  
115 *Scnn1a* (Fig 3 B) expressing cells (cyan) in the GCL consists of at least three different types  
116 of cells: GFP, GFP/calretinin and GFP/calretinin/parvalbumin (Fig 3 A, B arrows). Moreover,  
117 for *Scnn1a* we found an additional subset of GFP/parvalbumin cells (Fig 3 B magenta arrows).  
118 Thus, some of our *Grik4* and *Scnn1a* RGCs should overlap with the known 8-14 parvalbumin

119 RGC types and the ~10 different calretinin RGC types (25). So far nothing is known about  
120 Grik4 or Scnn1a expression in parvalbumin and calretinin RGCs. However, the rare  
121 parvalbumin/calretinin co-expressing RGCs have been functionally described before  
122 (27,30,31), hence their typical response characteristics should be easy to spot in our Grik4  
123 and Scnn1a functional clusters (see below).

124 The GCL consists mainly of RGCs but it also contains displaced amacrine cells (dACs). We  
125 investigated whether dACs contribute to the pool of Grik4 and Scnn1a cells in the GCL. First,  
126 we double-labelled Grik4 and Scnn1a retinal vertical sections against GFP (Fig 3 C, D cyan)  
127 and RBPMS (Fig 3 C, D magenta). Approximately 50% of the GFP labelled Grik4 cells in the  
128 GCL are RBPMS positive (Fig 3 C, arrows), and the other cells presumably are dACs as they  
129 did not stain for RBPMS. In support, the somata of putative dACs in the GCL are relatively  
130 small, a key feature of these cells (Fig 3 C, GCL). A similar pattern was found for Scnn1a cells  
131 in the GCL but here, the majority (50-60%) of Scnn1a cells are RGCs (Fig 3 D, arrows).  
132 Sparsely distributed cells expressing either Grik4 (Fig 3 C, cyan) or Scnn1a (Fig 3 D, cyan)  
133 were present in the proximal inner nuclear layer (INL). These cells did not stain for RBPMS,  
134 confirming they are amacrine cells (ACs).

135 In summary, the pool of Grik4 and Scnn1a cells in the GCL respectively consists of at least  
136 three and four different cell types. It is likely that these different cell types reflect RGCs and  
137 not dACs because we did not find any putative Grik4- or Scnn1a-positive ACs in the INL  
138 expressing calretinin and/or parvalbumin (Fig 3 A, B, INL). Such information is important for  
139 the validation of our novel approach for the functional classification of these same RGCs. If  
140 our cluster size falls below these numbers, it would indicate that our method is flawed.

141

142 The presence of Grik4 and Scnn1a DREADD ACs was not expected. Excitatory Grik4 and  
143 Scnn1a DREADD ACs will have profound effects on their postsynaptic RGC partners. Indeed,



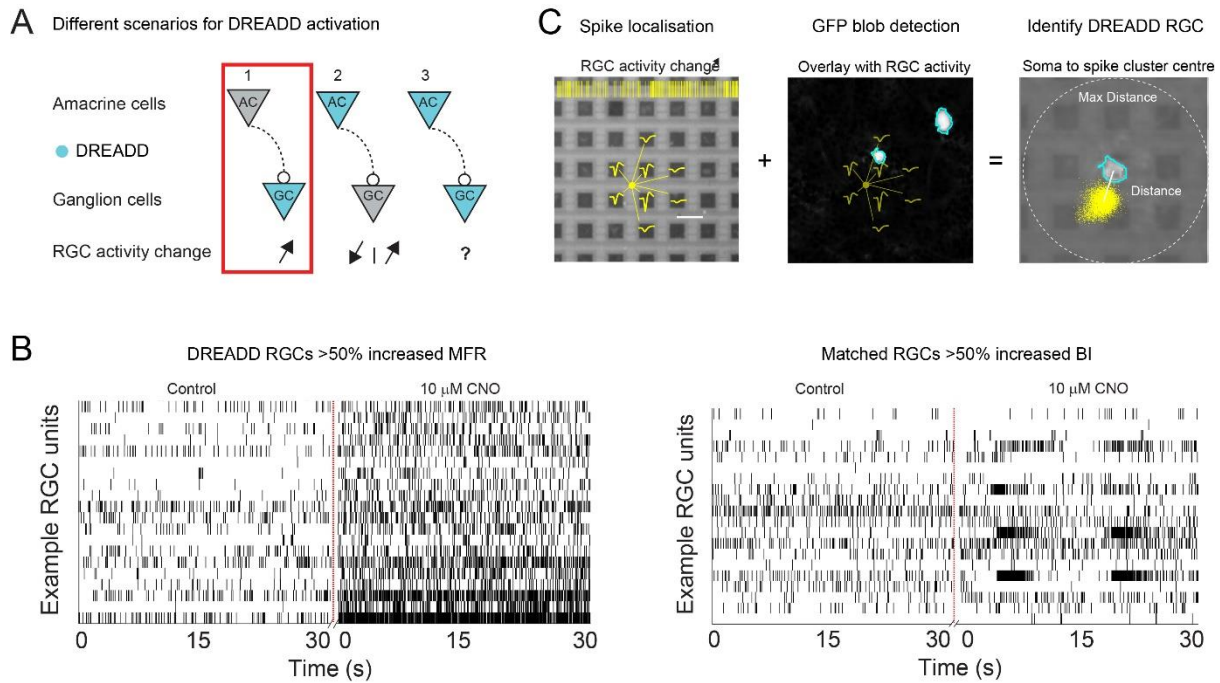

**Figure 4: Registering GFP RGCs with nearby isolated spike centre clusters to unequivocally isolate DREADD RGCs.** Activation of DREADD ACs can lead to different scenarios in RGC activities (A). DREADDs in RGCs can be activated with Clozapine N-oxide (CNO) and lead to an increase in firing frequency (B, left) and sometimes also in bursting activity (B, right). Vertical lines represent spike times plotted as a function of time. The interpolation of spike amplitudes from the same RGC defines the potential electrical source location of the isolated RGCs (C, left). Micrographs of DREADD-GFP expressing cells in the GCL were aligned with the MEA grid (C, middle). Spike centres from RGCs that showed an increase in activity and near GFP labelled RGCs were registered as potential DREADD-expressing RGCs (C, right).

144 a single AC affects nearly every RGC within reach of its dendrites (32). For example, let us  
 145 consider a simple network with one population of ACs which modulate one population of RGCs  
 146 (Fig 4 A). Figure 4 explores different scenarios. If DREADDs are expressed only on RGCs  
 147 (Fig 4 A, scenario 1), adding CNO will have a direct excitatory effect on RGCs, increasing their  
 148 activity and straightforward isolation for further classification. On the other hand, if there are  
 149 DREADDs on ACs as well, CNO will either depolarise only DREADD ACs (Fig 4, scenario 2)  
 150 or simultaneously DREADD ACs and RGCs (Fig 4A, scenario 3). These situations are more  
 151 challenging, as they make it difficult to identify DREADD RGCs based solely on activity levels.  
 152 Depending on whether they are excitatory or inhibitory cells, such DREADD ACs would lead  
 153 to increased or decreased activity in non-DREADD RGCs (scenario 2), thus leading to false-  
 154 positive identification of DREADD RGCs. Finally, the presence of DREADDs both in ACs and

155 in RGCs will lead to an uncertain outcome, depending on the nature of the AC (Fig 4 A,  
156 scenario 3).

157 Whatever the scenario is, we cannot rely on changes in DREADD RGC activity alone to  
158 identify DREADD-expressing RGCs. Hence, we applied a two-steps protocol to unequivocally  
159 isolate DREADD RGCs. In the first step, we pre-identify cells that show either an increase in  
160 spontaneous firing rate (Fig 4 B, left) or in the Burst Index (Fig 4 B, right) (33) in the presence  
161 of CNO. Next, the physical position of these identified RGCs is correlated with micrographs of  
162 DREADD-GFP expressing cells in the GCL (Fig 4 C). Further technical details and codes are  
163 available in the Method section and our GitHub documentation. Briefly, due to the high  
164 electrode density, the activity of one RGC is recorded on multiple adjacent electrodes (Fig 4  
165 C, left). The x and y position of the spike origin (Fig 4 C, left, yellow dot) is calculated using  
166 the spike interpolation algorithm in Herdingspikes2 (34,35). A stitched high-resolution image  
167 of GFP stained cells in the GCL is then aligned with the MEA electrode grid (Methods & GitHub  
168 documentation). Image segmentation techniques are used to threshold the GFP foreground  
169 from the background and a blob detection is applied to detect the outlines and centre of Grik4  
170 and Scnn1a GFP positive cells in the GCL (Fig 4 C, middle). Lastly, the Euclidian distance  
171 between the centre of the GFP cell and the spike origins of the surrounding RGCs is  
172 calculated. RGC units showing >50% increase in activity levels AND localised within a 60  $\mu\text{m}$   
173 radius of the GFP centre (Fig 4 C, right) are registered to be DREADD RGCs for Grik4 and  
174 Scnn1a retinas, respectively.

175 The rationale for choosing a 50% activity increase threshold and 60  $\mu\text{m}$  distance is as follows.  
176 Spikes originate from the axon initial segment (AIS) rather than from the cell body. Therefore,  
177 we expect the spike cluster centre to be slightly eccentric with respect to the soma itself. The  
178 exact location of the AIS in RGCs can be very close to the soma (<30  $\mu\text{m}$ ), or sometimes  
179 rather distant along the axon (>30  $\mu\text{m}$ ), depending on the eccentricity of the cell with regard  
180 to the optic nerve head (36,37). For every detected Grik4 (Fig 5 A) and Scnn1a (Fig 5 B) GFP

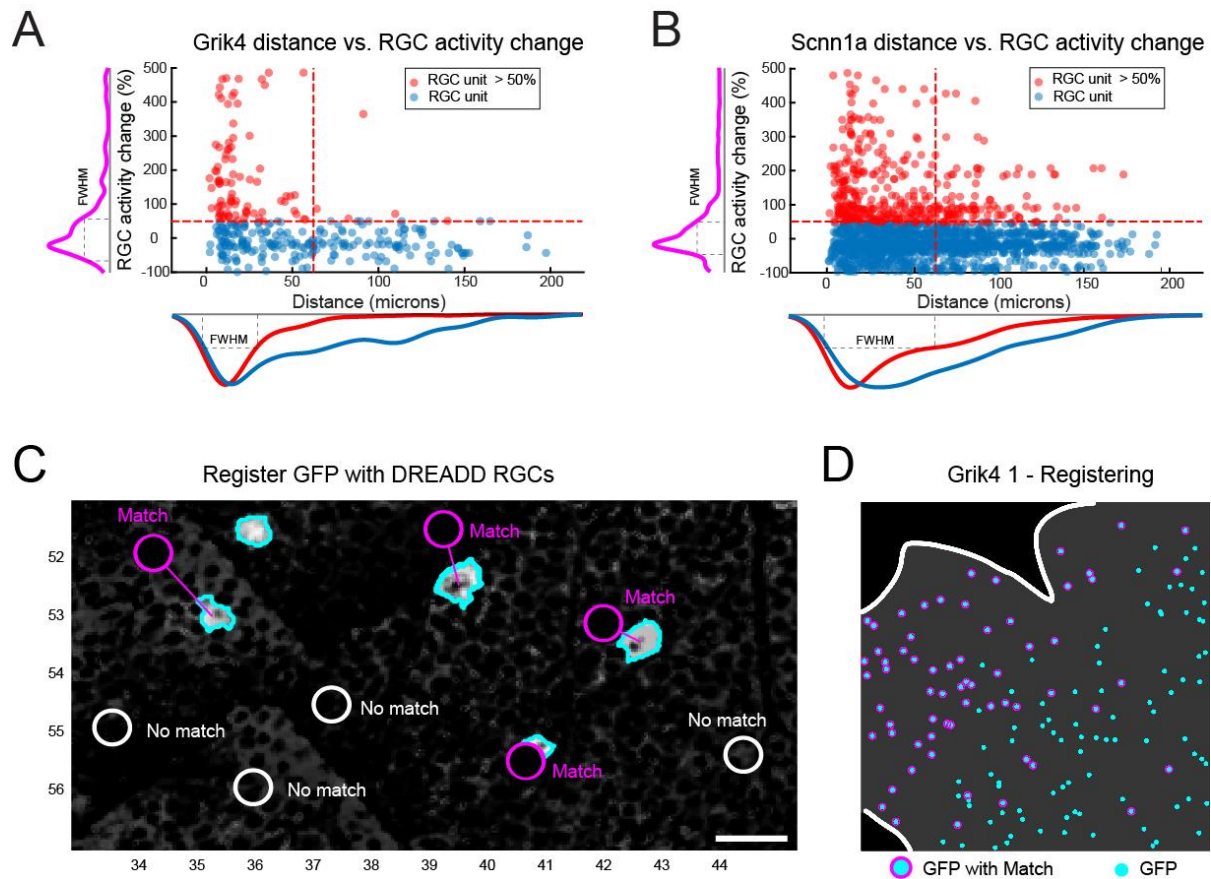

**Figure 5: Defining suitable thresholds to isolate DREADD RGCs.** The Euclidian distances from all spike cluster centres within a radius of 200  $\mu\text{m}$  to a Grik4 (A) or Scnn1a (B) GFP cell are plotted as a function of their RGC spiking/bursting change (higher value). Red dots represent RGCs clusters that exceeded the 50% RGC activity change threshold. The y-axis distribution curve is summarising blue and red dots (magenta). The x-axis distribution curve is separating red and blue dots. FWHM = full width at half maximum. C) RGC units that were physically located within a 60  $\mu\text{m}$  radius AND exhibited at least 50% increase in spiking or bursting rate were defined as DREADD RGCs (Match). White circles represent RGC units that did fall into the set criteria (No match). D) The steps are applied to all GFP cells. NB the recording area is generally not completely covering the entire 64 x 64 array i.e., covering all GFP cells.

181 cell, we collected the activity change information (spiking rate or burst index change,  
 182 depending on what is more prominent) from all RGCs after application of CNO within a 200  
 183  $\mu\text{m}$  radius (Fig 5 A, B). Most cells do not express DREADDS, and therefore were not or only  
 184 very slightly affected by CNO, showing a peak around 0% RGC activity change (Fig 5 A, B,  
 185 magenta distribution curve). The RGC activity change curve (magenta) falls back to baseline  
 186 levels at around 100% RGC activity change both for Grik4 (Fig 5 A) and Scnn1a (Fig 5 B). We  
 187 defined the 50% full width at half maximum (FWHM, Fig 5 A, B dashed line) value of the curve

188 (Fig 5 A, B) as a good threshold for defining spiking (and bursting) activity changes in DREADD  
189 RGCs after application of CNO (Fig 4 B). Notably, higher RGC activity changes (>50%) were  
190 closer (<30  $\mu\text{m}$ ) to the soma (Fig 5 A, red), further confirming that these activity changes  
191 belong to the corresponding DREADD GFP cells. A similar relation between “distance from  
192 soma” vs “RGC activity change” can be found in Scnn1a retinas (Fig 5 B, red) although some  
193 potential DREADD RGCs appear to be located further away from the soma (up to 100  $\mu\text{m}$ )  
194 than Grik4 cells. Both red distribution curves (Fig 5 A, B) have their peak around 10  $\mu\text{m}$  and  
195 plateau around 60 and 120  $\mu\text{m}$ , respectively for potential Grik4 and Scnn1a RGCs. The FWHM  
196 distance from soma value for Grik4 is 30  $\mu\text{m}$  and for Scnn1a, 60  $\mu\text{m}$ . Based on these  
197 observations, we concluded that using the 60  $\mu\text{m}$  radius was sufficient to reliably determine  
198 whether an isolated spike cluster corresponds to a specific GFP-expressing cell and thus  
199 represents a DREADD RGC. It is also close to the maximum thresholds given in the literature  
200 (36,37).

201 The process of correlating physical spike positions with structural imaging allowed us to  
202 unequivocally isolate Grik4 and Scnn1a RGCs. Such cases are referred to as “Match”, and  
203 those falling outside these boundaries are classified as “No Match” (Fig 5 C). We successfully  
204 analysed three Grik4 and five Scnn1a retinas to register “Match” (Fig 5 C, D, magenta) cells.  
205 Figure 5 D is a representative example from one of the Grik4 retinas. Note that the recording  
206 area is generally not completely covering the entire 64 x 64 array. In total, we identified 82  
207 “Match” RGCs in the three Grik4 retinas and 107 in the five Scnn1a retinas. However, most  
208 RGCs did exhibit changes (>50%) in firing rate or bursting without revealing any GFP signals,  
209 hence they are unlikely to be Grik4 or Scnn1a RGCs. These cells are most likely other RGC  
210 types affected by DREADD expressing ACs, and they outnumber the “Match” RGCs by a  
211 factor of 10 (Grik4 pool consists of 1030 DREADD AC-driven RGCs, and for Scnn1a the pool  
212 has 1151 cells). In summary, we successfully combined near pan-retinal recordings with *post*  
213 *hoc* anatomical characterization and isolated GFP-positive Grik4 and Scnn1a RGCs with  
214 increased spiking or bursting activity in the presence of CNO.

215 In the next step, we identified Grik4 and Scnn1a RGCs according to changes in their spiking  
 216 pattern following DREADD activation with CNO, and we grouped them into functional clusters  
 217 based on response similarity.

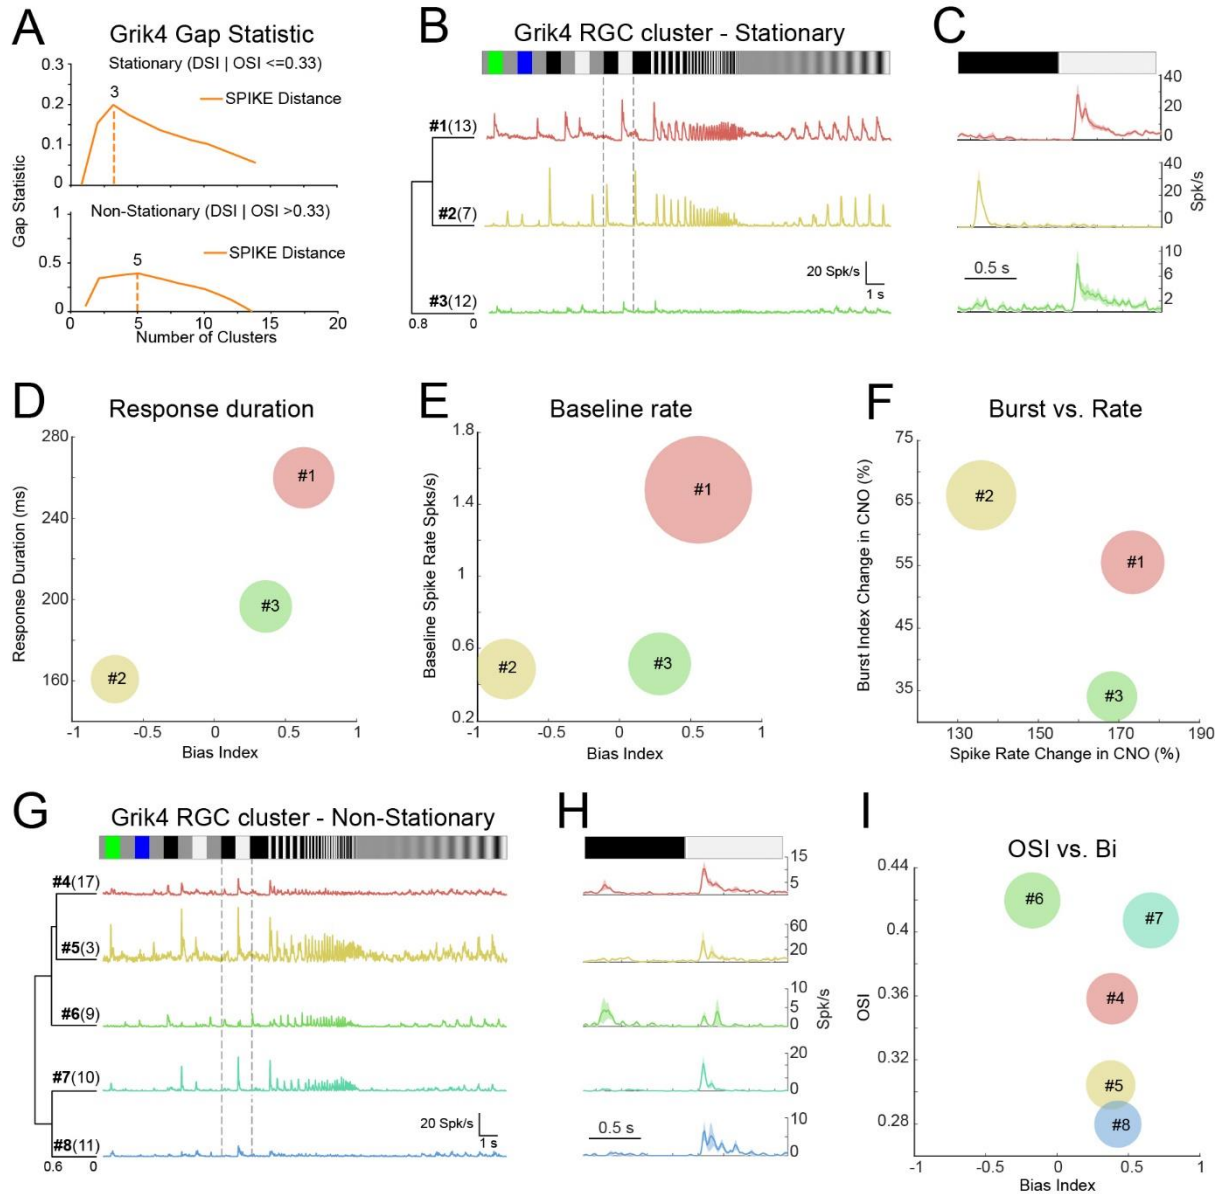

Figure 6: Clustering of Grik4 stationary and non-stationary RGC responses. RGC responses that showed a high spike train similarity for a chirp stimulus (B, F) were grouped together using gap statistics (A). For each RGC of the groups, the PSTH was calculated and the mean Chirp PSTH was plotted (B, G, coloured lines) together with their mean PSTH to a black-white contrast step (C, H). The means for Bias Index (D, E, I), Response Duration (D), Baseline Spiking (E), Burst change (F), Spike Rate change (F) and orientation selectivity index (OSI, I) index were scatter plotted and their standard deviations were used as the circle diameters.

218 After the successful registration of spikes with Grik4/Scnn1a GFP RGCs, we grouped these  
219 RGCs according to their response preference for stationary (static, full field) and non-  
220 stationary (moving, orientations) images. Briefly, cells that were exceeding a threshold value  
221 (see Methods) for their direction or orientation selectivity index (DSI and OSI, respectively)  
222 were classified as non-stationary.

223 In the last and final step of our classification protocol, we grouped the registered DREADD  
224 RGCs into functional groups according to the nature of their responses to light. We recently  
225 described a non-parametric approach for unsupervised RGC classification by using the SPIKE  
226 distance (38,39) as a clustering metric (10). In order to use that approach, it is necessary to  
227 have a stimulus that elicits responses simultaneously over the entire recording area. Here we  
228 used a chirp stimulus inspired from Baden et al (2016) (5) that elicits responses from all RGCs  
229 at the same time to pre-sort stationary and non-stationary RGCs (chirp, Fig 6 B, G, top) for  
230 SPIKE distance measure and hierarchical agglomerative clustering. We manually validated  
231 our detected clusters by grouping several response parameters, e.g. bias index (ON, ON-OFF  
232 or OFF) or response duration (transient or sustained), from the chirp and moving bars (for  
233 example Fig 6 D-F, I). Manual grouping was only feasible because the expected cluster  
234 numbers for Grik4 and Scnn1a were small (respectively 3 and 4 according to our IHC  
235 analyses). The pairwise SPIKE distances were determined from all trials of the chirp stimulus  
236 and the resulting distance matrix of stationary and non-stationary RGCs was clustered with a  
237 hierarchical clustering algorithm followed by the construction of a dendrogram as shown in  
238 Jouty et al., 2018 (10). To find the optimal number of clusters for stationary and non-stationary  
239 SPIKE distances we used gap statistics (10,40). For stationary and non-stationary Grik4  
240 RGCs, gap statistics estimated three and five response clusters (Fig 6 A), respectively.

241 For stationary Grik4, we found ON sustained (#1,  $n = 13$ ), OFF transient (#2,  $n = 7$ ) and weak  
242 ON sustained (#3,  $n = 12$ ) response types. To validate these three detected stationary clusters,  
243 we plotted the mean bias index against the mean response duration from all RGCs in a cluster  
244 (Fig 6 D), revealing three distinct groups that corresponded to the confirmed stationary RGC

245 types. Moreover, spontaneous activity follows very specific patterns for certain RGC types and  
 246 can therefore help classification. Plotting the mean Bias Index against mean spontaneous  
 247 firing rate (baseline firing) revealed that the ON sustained cluster #1 (Fig 6 B, E) exhibited a  
 248 very strong baseline firing rate (Fig 6 E, red bubble). The same plot also shows that the two  
 249 other RGC types have a moderate baseline firing rate and further confirmed the three well  
 250 separated RGC types. Whether the spontaneous firing rate becomes more bursting or simply  
 251 increases monotonously in the presence of CNO can be used to further group RGCs into  
 252 clusters (Fig 6 F). Interestingly, the effect of CNO for bursting on cluster #3 is minimal (Fig 6  
 253 F, green) whereas it is higher for clusters #1 & #2 (Fig 6 F, red & yellow).

254 *Table 1 Summary of Grik4 RGC types with cross-reference to known types*

| Grik4 cluster   | Baden et al., 2016     | Tran et al., 2019 | Farrow et al., 2013 | Other                               |
|-----------------|------------------------|-------------------|---------------------|-------------------------------------|
| #1 ON sust.     | G22, ON sust.          |                   | PV1                 | PixOn, Johnson et al., 2018         |
| #2 OFF trans.   | G8, OFF alpha trans    | 45                | PV5                 | OFF-t, Krieger et al., 2017         |
| #3 ON sust.     |                        |                   |                     | Weak ON sust. responses             |
| #4 ON-OFF DS    | G12, ON-OFF DS         | 10, 16, 24        | PV0                 | OO-DSGC, Rivlin-Etzion et al., 2011 |
| #5 ON trans. DS | G18, ON trans. (DS)    |                   | PV2/3               |                                     |
| #6 ON-OFF OS    | G14, (ON)-OFF local OS |                   |                     |                                     |
| #7 ON trans. OS | G17, ON local trans OS |                   |                     |                                     |
| #8 ON sust. DS  | G26, ON sust. DS       |                   | PV1                 |                                     |

255

256 Most of the non-stationary RGCs barely responded to the chirp stimulus (Fig 6 G, H) but that  
 257 response was, albeit modest, reliable and unique for the different clusters. We used the  
 258 orientation (OS) and direction selectivity (DS) index in addition to the chirp PSTH parameters  
 259 to define the five non-stationary Grik4 clusters. We found ON-OFF direction selective (DS)  
 260 (#4, n = 17), ON trans. DS (#5, n = 3), ON-OFF orientation selective (OS) (#6, n = 9), ON  
 261 trans. OS (#7, n = 10) and ON sust. DS (#8, n = 11) response groups in the pool of non-  
 262 stationary Grik4 RGCs. All groups were DS; hence we used the OS index vs Bias Index (BI)

263 for our manual validation. All clusters are clearly distinguishable from each other (Fig 6 I).  
 264 Clusters #4, 5, and 8 have a similar mean BI, but Cluster #7 tends to be marginally more ON  
 265 and OS (Fig 6 I). Cluster #6 is an OS and ON-OFF cell. In summary (Tab 1), we found three  
 266 stationary RGCs types and five non-stationary RGC types that share the Grik4 gene pool.

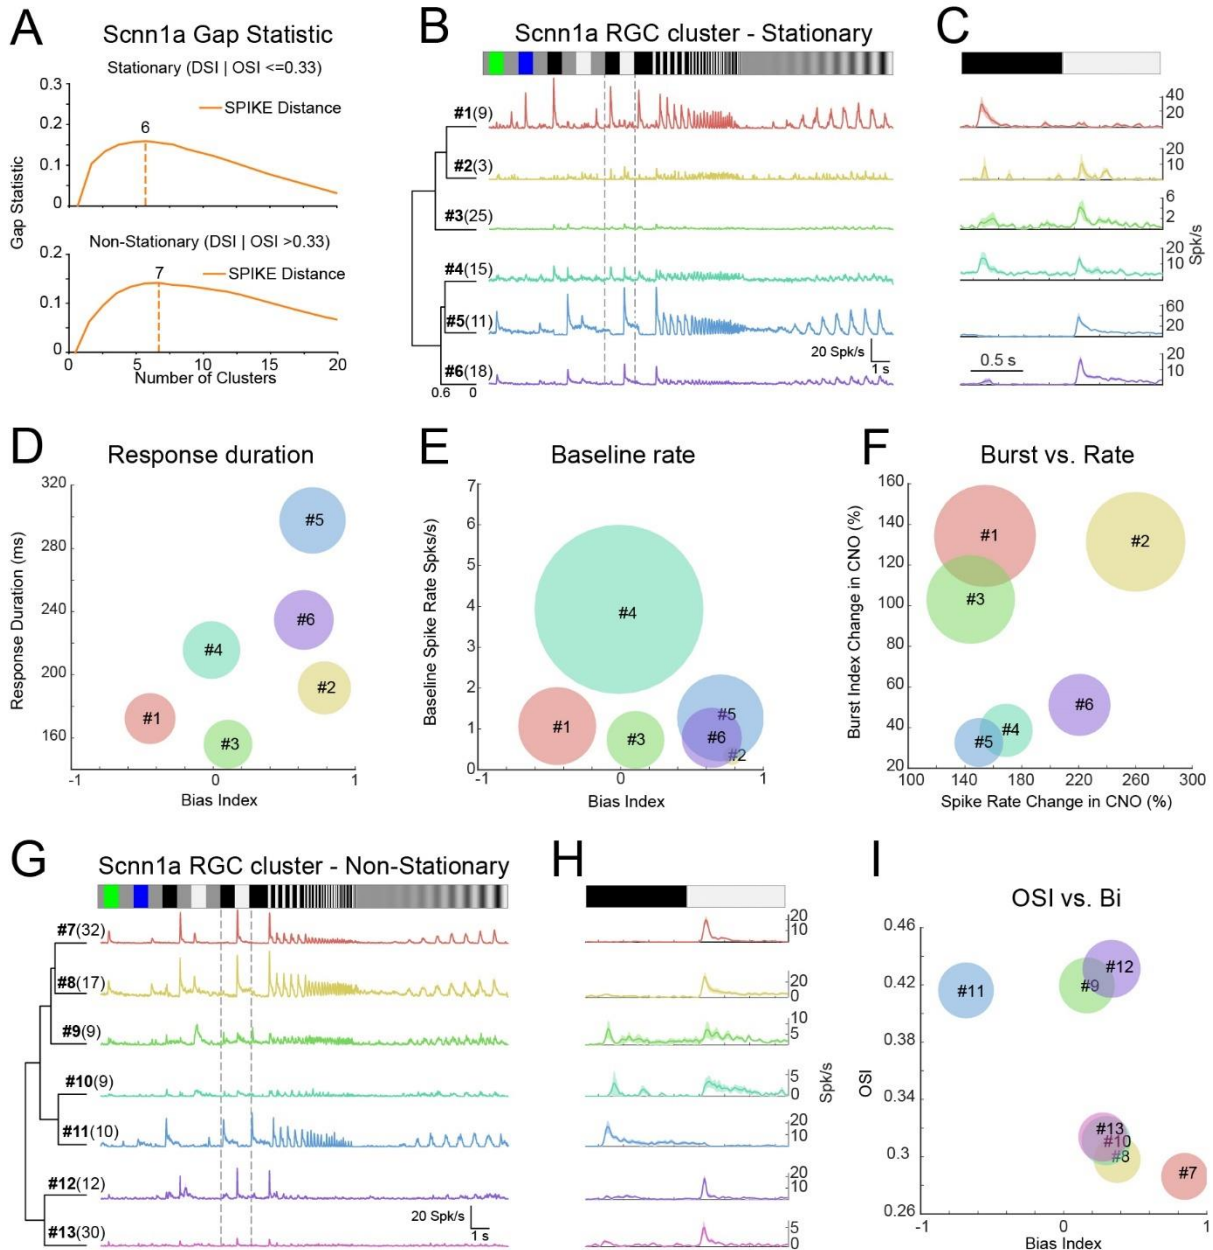

Figure 7: Clustering of Scnn1a stationary and non-stationary RGC responses. RGC responses that showed a high spike train similarity for a chirp stimulus (B, G) and black-white contrast (C, H) were grouped together using gap statistics (A). For each RGC of the groups, the PSTH was calculated and the mean PSTH was plotted (B, C, G, H, coloured lines). The means for Bias Index (D, E, F), Response Duration (D), Baseline Spiking (E), Burst change (F), Spike Rate change (F) and orientation selectivity index (OSI, I) index were scatter plotted and their standard deviations were used as the circle diameters.



267 We proceeded in a similar way with stationary and non-stationary registered Scnn1a RGCs  
 268 (Fig 7). Gap statistics suggested six clusters for stationary and seven for non-stationary  
 269 clusters (Fig 7 A). The dendrogram of the chirp and black-white contrast PSTH consists of  
 270 OFF transient (#1, n = 9), ON-OFF (#2, n = 3; #3, n = 25; #4, n = 15), ON sustained (#5, n =  
 271 11) and ON transient (#6, n = 18) like responses for stationary Scnn1a RGC types (Fig 7 B,  
 272 C). Further analysis revealed that the response parameters (Fig 8 D - Bias Index vs Response  
 273 Duration; Fig 8 F – Burst vs Spike Rate Change) were clearly distinct from each other. At the  
 274 same time, the distinction is less clear when comparing Baseline vs Bias Index (Fig 7 E). The  
 275 effect of CNO on the different Scnn1a RGCs was also diverse (Fig 7 F) with cluster #5 barely  
 276 affected and #2 profoundly affected.

277 *Table 2 Summary of Scnn1a RGC types with cross-reference to known types*

| Scnn1a cluster  | Baden et al., 2016     | Tran et al., 2019 | Farrow et al., 2013 | Other                               |
|-----------------|------------------------|-------------------|---------------------|-------------------------------------|
| #1 OFF trans.   | G8, OFF alpha trans    | 45                | PV5                 | OFF-t, Krieger et al., 2017         |
| #2 ON-OFF       |                        |                   |                     | Potentially belongs to #4           |
| #3 ON-OFF       |                        |                   |                     | Weak ON-OFF responses               |
| #4 ON-OFF       | G10, local edge W3     | 6                 |                     | W3, Zhang et al., 2012              |
| #5 ON sust.     | G22, ON sust.          |                   | PV1                 | PixOn, Johnson et al., 2018         |
| #6 ON trans     | G18, ON trans.         |                   | PV2/3               |                                     |
| #7 ON trans. DS | G16, ON DS trans.      |                   |                     |                                     |
| #8 ON sust. DS  | G25, ON DS sust. 1     |                   |                     |                                     |
| #9 ON-OFF OS    | G14, (ON)-OFF local OS |                   |                     |                                     |
| #10 ON-OFF DS   | G12, ON-OFF DS         | 10, 16, 24        | PV0                 | OO-DSGC, Rivlin-Etzion et al., 2011 |
| #11 OFF OS      | G1, OFF local OS       |                   |                     |                                     |
| #12 ON OS       | G17, ON local trans OS |                   |                     |                                     |
| #13 ON DS       |                        |                   |                     | Weak ON DS responses                |

278

279 The non-stationary Scnn1a RGCs (Fig 8 F) clustered into ON transient DS (#7, n = 32), ON  
 280 sustained DS (#8, n = 17), ON-OFF OS (#9, n = 9), ON-OFF DS (#10, n = 9), OFF OS (#11,

281 n = 10), ON OS (#12, n = 12) and ON DS (#13, n = 30) like responses. Although there was  
282 some overlap between certain clusters (#8, #10 and #13) when plotting the Bias Index and  
283 OS index means (Fig 7 I), their chirp PSTH plots were substantially different, suggesting that  
284 these cells do belong to distinct functional groups. Therefore, it is likely that the Scnn1a RGC  
285 pool consists of several DS and OS cells which will necessitate further investigation to  
286 establish their basic functional differences. In summary (Tab 2), we found a minimum of six  
287 stationary and a maximum of seven non-stationary Scnn1a RGC types.

288

## 289 Discussion

290 We established a novel approach for RGC classification, based on grouping of cells sharing  
291 gene expression and similarities in their light response patterns. A previous approach used  
292 pharmacogenetics in combination with MEA recordings for Parvalbumin RGC classification  
293 (29). PV expressing cells in the retina are manifold with at least 8 RGC types (24,41) and a  
294 distinct number of ACs. Other approaches combined MEA recordings with anatomical imaging  
295 (42,43) to unequivocally isolate DREADD ganglion cells. We successfully used excitatory  
296 DREADD activation in retinal cells in combination with IHC and large-scale retinal  
297 electrophysiology to provide a pan-retinal phenotypical description of Grik4- and Scnn1a-  
298 expressing RGCs in the mouse retina. We extended the pre-existing list of Grik4 expressing  
299 RGC types and, for the first time, we provide a functional description of Scnn1a-expressing  
300 RGCs. We also showed that certain types of ACs express Grik4 and Scnn1a and that exciting  
301 these cells with DREADD activation leads to changes in firing frequency in many undefined  
302 RGCs. We used DREADD instead of the more common optogenetic technique because the  
303 retina is light sensitive and we don't want to use strong lights that interfere with our stimuli.  
304 Our approach is not restricted to retinal cells but is widely applicable to other neurons from  
305 other brain regions e.g. cortical slices. It is a scalable multimodal approach and can provide

306 fast grouping of large cohorts of neurons with similar gene expression. Additionally, we provide  
307 a complete framework to combine high-density MEA recordings with *post hoc* cell labelling.

308 Grik4 expression in the retina has been described (13,43–46) but there is functional  
309 characterization only for two RGC types (45,46). Johnson et al., 2018 (46) reported that the  
310 Grik4-expressing PixON RGC type is an ON sustained type and has strong spontaneous  
311 activity. Our Grik4 cluster #1 from the stationary RGCs (Tab 1) has the same key phenotypic  
312 features - sustained responses and strong spontaneous activity. Cluster #1 also matches with  
313 the group (G) 22 from Baden et al., 2016 (5) and PV1 from Farrow et al., 2013 (41). Rivlin-  
314 Etzion et al., 2011 (45) reported a Grik4 positive ON-OFF DS RGC type. Such a response  
315 type is found in our non-stationary Grik4 cluster #4 which corresponds to G12 (Baden et al.,  
316 2016), dorsal-temporal clusters 10, 16, 24 in Tran et al., 2019 and PV0 in Farrow et al., 2013.  
317 Our novel classification approach was able to match two previously reported Grik4 response  
318 types, and such similarities provide solid validation for the methodology itself. Further, Grik4  
319 stationary cluster #2 potentially resembles G8 (OFF alpha transient) which is further described  
320 in Krieger et al., 2017 (47) and in Tran et al., 2019 (cluster 45). The other Grik4 clusters with  
321 their cross-reference match are listed in tab 1.

322 For Scnn1a, we found six stationary and seven non-stationary RGC response groups (Tab 2).  
323 Interestingly, the Scnn1a cluster #5 shows remarkable similarity with the PixON characteristics  
324 described earlier - sustained responses and high baseline firing. Stationary Scnn1a cluster #1  
325 seems to be an OFF alpha transient type (Krieger et al., 2017). Last, cluster #10 is potentially  
326 the ON-OFF DS RGC type reported by Rivlin-Etzion et al., 2011. There are no reports about  
327 Grik4 and Scnn1a co-expressing cells but it is not uncommon that certain RGC types share  
328 the same genes e.g. *Foxp* AND *Brn3* (30) or *Pvalb* AND *Calb2* (27,30,31). In summary, our  
329 approach is able to group RGC response types recorded across large MEA recordings into  
330 established response clusters and finds correlates in previous reports (tab 1, 2). However, our  
331 approach yields a large number of clusters for each gene pool, demonstrating that it is a  
332 powerful classification tool.

333 Grik4 clusters #1, #2 #4, #5, #8 and Scnn1a clusters #1, #5, #6, #10 are parvalbumin positive  
334 (5,14,41,47) and in line with our IHC results that revealed many Grik4 and Scnn1a and  
335 parvalbumin expressing RGCs. Baden et al. (2016) found many more parvalbumin-expressing  
336 RGC types than the traditionally known 8 types from anatomical studies (24). We suspect that  
337 there is some overlap between Grik4 and yet undescribed parvalbumin, potentially also  
338 calretinin RGC types. We currently investigate the functional features of parvalbumin and  
339 calretinin co-expressing RGCs using a similar methodology (31). Lee et al., 2010 (25) reported  
340 calretinin and parvalbumin co-expression in a subset of RGC types that would correlate to our  
341 Grik4 clusters #4, #5 and #8, as well as Scnn1a clusters #5, #6, #8 and #10. Here our  
342 classification results come full circle and match with the parvalbumin and calretinin IHC results  
343 where we find all combinations.

344 DREADDs were also expressed in one or several yet undescribed AC types. For Scnn1a, we  
345 found few GABAergic ACs (not shown) but most GFP-positive ACs were not characterized  
346 further. For Grik4, we did not find any GABAergic ACs, nor were we able to define the AC type  
347 with our experimental means. The net effect of CNO induced activity in DREADD ACs can  
348 have many forms leading to a priori undetermined situations. For example, it is known that  
349 cascade of inhibition can result in excitation (e.g. push-pull effect) (48). A possible solution to  
350 this problem relies on a quantitative analysis requiring considering the factors constraining  
351 individual cell responses without and with CNO, and the network connectivity. It is possible to  
352 propose a map of CNO induced scenarios in simple situations, with a suitable space of  
353 relevant biophysical parameters. These questions will be addressed on modelling and  
354 mathematical grounds in a forthcoming paper.

355 Finding DREADD expression in ACs was initially challenging. We managed to circumvent the  
356 interference of DREADD activated ACs by combining MEA recordings with cell labelling, which  
357 renders experiments much more complex. Our experimental design was based on Cre-Lox  
358 recombination, resulting in DREADD expression in all cells with the same promoter gene in  
359 the organism. In future work, DREADD expression should be targeted only to RGCs via viral

360 transfection in order to avoid such strong side effects (49). Blocking AC input onto postsynaptic  
361 targets (bipolar cells or RGCs) would be another solution but has a big caveat: such  
362 disinhibition leads to massive increase in activity levels in all RGCs (not shown), hence  
363 masking RGC specific DREADD activation in specific subgroups where DREADDs are directly  
364 expressed on RGCs. Alternatively, using intracellular recordings from single cells could  
365 exclusively target Grik4 and Scnn1a RGCs based on GFP expression, and DREADD  
366 activation with CNO would be redundant. Such an approach would provide unequivocal  
367 recordings from RGCs, but at the same time, the throughput would be extremely low, and all  
368 network information (provided by recording simultaneously from many homotypic RGCs)  
369 would be lost (looking at this information will be the subject of a separate publication). Lastly,  
370 it is known that the Cre-lox recombination has disadvantages (50) and sometimes leads to off-  
371 target expression. We followed the breeding advice from the manufacturer and used animals  
372 from different breeding pairs.

373 In summary, our approach is able to quickly isolate large numbers of neurons at once while  
374 retaining all network information. This approach does not have to be restricted to DREADD  
375 technology, and our framework can be used also only with cell labelling (see also (31)).

376

## 377 **Methods**

### 378 *Animals and retina preparation:*

379 All experimental procedures were approved by the ethics committee at Newcastle University  
380 and carried out in accordance with the guidelines of the UK Home Office, under control of the  
381 Animals (Scientific Procedures) Act 1986. Grik4 (C57BL/6-Tg(Grik4-cre)G32-4Stl/J, the  
382 Jackson Laboratory, MA, JAX Stock No: 006474) and Scnn1a (B6;C3-Tg(Scnn1a-cre)3Aibs/J,  
383 JAX Stock No: 009613) mice were cross-bred with Gq-DREADD mice (B6N;129-Tg(CAG-  
384 CHRM3\*,-mCitrine)1Ute/J, JAX Stock No: 026220) to generate a strain of mice with the  
385 excitatory Gq-DREADD expressed in Grik4 and Scnn1a expressing cells (Grik4-DREADD and

386 Scnn1a-DREADD, respectively). In addition, we crossbred the Grik4 and Scnn1a lines with an  
387 inhibitory DREADD (B6.129-*Gt(ROSA)26Sortm1(CAG-CHRM4\*, -mCitrine)Ute*/J, JAX Stock  
388 No: 026219) but the effect on RGC firing rate was negligible and the litters were used only for  
389 immunofluorescence studies. Male and female wild-type, Grik4-DREADD and Scnn1a-  
390 DREADD mice, housed under a 12-hour light-dark cycle and aged between postnatal days  
391 (P) 53-148 were used for the experiments. Mice were dark-adapted overnight and killed by  
392 cervical dislocation. Eyes were enucleated, and following removal of the cornea, lens, and  
393 vitreous body, they were placed in artificial cerebrospinal fluid (aCSF) containing the following  
394 (in mM): 118 NaCl, 25 NaHCO<sub>3</sub>, 1 NaH<sub>2</sub>PO<sub>4</sub>, 3 KCl, 1 MgCl<sub>2</sub>, 2 CaCl<sub>2</sub>, 10 glucose, and 0.5 l-  
395 Glutamine, equilibrated with 95% O<sub>2</sub> and 5% CO<sub>2</sub>. The ventral and dorsal orientation was  
396 marked after enucleation. The retina was isolated from the eye cup and flattened for MEA  
397 recordings. For vertical cryosections, mouse eyecups were fixed in 4% paraformaldehyde  
398 (PFA; Alfa Aesar, MA) in 0.1 M phosphate buffer solution (PBS) for 2 x 20 minutes at room  
399 temperature and washed with PBS several times. For whole mounts, retinas were isolated  
400 from the eye cup and mounted on nitrocellulose paper (Sartorius, Germany) and transferred  
401 to 4% PFA in PBS (2 x 20 min), rinsed in PBS and prepared for further procedures. All  
402 procedures involving live animals and retinas were performed in dim red light and the room  
403 was maintained in darkness throughout the experiment.

404

#### 405 *Immunohistochemistry and image acquisition:*

406 After enucleation and fixation, the retinal tissue was processed in different ways for vertical  
407 and whole mount IHC. For vertical sections, eyecups were cryoprotected in 30% sucrose in  
408 PBS overnight at 4°C and embedded in OCT Tissue TeK (Sakura, NL) at -20°C on the  
409 following day. Vertical sections (15-20 μm) were cut on a OTF5000 cryostat (Bright  
410 Instruments, UK) and collected on Superfrost microscope slides (Thermo Fisher). Vertical  
411 sections and whole mounts were blocked with 10% normal goat serum (NGS) and/or 10%  
412 normal donkey serum (NDS) in PBS for at least 30 minutes at room temperature.

413 After the blocking procedure and a short rinse in PBS, vertical sections were incubated with  
414 primary antibodies in 5% NGS (and/or NDS) + 1% Triton X-100 + PBS overnight at 4°C. Whole  
415 mounts were incubated free-floating with primary antibodies in 5% NGS (and/or NDS) + 1%  
416 Triton X-100 + PBS for 4-5 days at 4°C. Incubation with secondary antibodies in 1% Triton X-  
417 100 in PBS was carried out for 2 hours at room temperature for vertical sections or overnight  
418 at 4°C for whole mounts. Details of the primary antibodies are as follows: anti-GFP (chicken,  
419 Abcam 13970, 1:500-1000), anti-RBPMS (rabbit, Phosphosolutions 1830, 1:1000), anti-GABA  
420 (mouse, Sigma Aldrich A0310, 1:1000), anti-Calretinin (mouse, Swant 6B3, 1:1000) and anti-  
421 Parvalbumin (rabbit, Swant PV27, 1:1000). Secondary antibodies are as follows (all  
422 concentrations 1:500): goat anti-chicken CF488, goat anti-rabbit Alexa568/Alexa647 and  
423 donkey anti-mouse Alexa647. After washing several times with PBS, sections and whole  
424 mounts were mounted in Vectashield (Vector Laboratories, UK). All incubations and washing  
425 procedures were performed in the dark.

426 Images were captured using either a Zeiss Axio Imager upright microscope with Apotome  
427 structured illumination fluorescence (using 20x/40x air objectives) or a Zeiss LSM800 confocal  
428 microscope with 40x oil objective (Zeiss, Germany) operated with Zen software. Whole mount  
429 images were stitched together using Zen software. All other image post processing was done  
430 with Fiji (<https://fiji.sc>), Adobe Photoshop (Adobe, CA) and MATLAB (Mathworks, MA). The  
431 steps between single sections of confocal stacks were not exceeding 1  $\mu\text{m}$  and 3 - 5 sections  
432 were superimposed with Fiji for presentation. For the cell density maps, cells were manually  
433 counted using the “Cell Counter” plugin in Fiji and a bivariate histogram (MATLAB *hist3*, bin  
434 size 60 x 60  $\mu\text{m}$ ) was calculated for the cell densities. For visualizing purposes, a 2-D Gaussian  
435 filtering was applied (MATLAB *imgaussfilt*, sigma 3).

436

437 *Large-scale, high-density multielectrode array recordings and light stimulation:*

438 Recordings were performed on the BioCamX platform with high-density-multielectrode array  
439 (HD-MEA) Arena chips (3Brain GmbH, Lanquart, Switzerland), integrating 4096 square

440 microelectrodes in a 2.67 x 2.67 mm area and aligned in a square grid with 42  $\mu\text{M}$  spacing.  
441 The isolated retina was placed, RGC layer facing down, onto the MEA chip and flattened by  
442 placing a small piece of translucent polyester membrane filter (Sterlitech Corp., Kent, WA,  
443 USA) on the retina followed by a home-made anchor. Retinas were maintained at 33°C using  
444 an in-line heater (Warner Instruments LLC, Hamden, CT, USA) and continuously perfused  
445 using a peristaltic pump ( $\sim 1 \text{ ml min}^{-1}$ ). Retinas were left to settle on the MEA for at least 2  
446 hours before recording. The platform records at a sampling rate of  $\sim 18 \text{ kHz/electrode}$  when  
447 using the full 64x64 array. Recordings are filtered at 50Hz high-pass filter using BrainWaveX  
448 software (3Brain) and stored in hdf5-based data format. Spikes were detected and sorted  
449 using Herdingspikes2 (<https://github.com/mhhennig/HS2>) as in (16). Briefly, spikes were first  
450 detected as threshold crossings individually on each channel, and then merged into unique  
451 events based on spatial and temporal proximity. For each detected spike, a location was  
452 estimated based on the signal centre of mass. Spike sorting was performed by clustering all  
453 events using a feature vector consisting of the locations and the first two principal components  
454 of the largest waveform.

455

456 Light stimuli were projected onto the retina as described elsewhere (17). Briefly, the projector  
457 irradiance was attenuated using neutral density filters to mesopic light levels (white 4  $\mu\text{W/cm}^2$ ).  
458 For stimuli we used a full field 'chirp' stimulus consisting of various 1-sec contrast steps,  
459 increasing frequency (1-15Hz) and contrast modulations (1-93 Michelson contrast) which was  
460 repeated 5 times. We also used random black and white moving bars (width 100  $\mu\text{M}$ , 12  
461 directions (30° separation)), 800  $\mu\text{m/s}$ , and the whole sequence was repeated 5 times. For the  
462 chirp and motion stimuli, we estimated each unit's instantaneous firing rate for the different  
463 stimuli by convolving its spike train with a Gaussian kernel smoothing function (standard  
464 deviation (SD) = 25 ms). We then averaged the trials and extracted several features including  
465 the Bias Index and the response duration (see (16)). On average, recording from one retina  
466 yields light responses from hundreds to thousands of individual RGCs.

467



468 *Registering RGC activity with IHC – blood vessels as reference marker:*

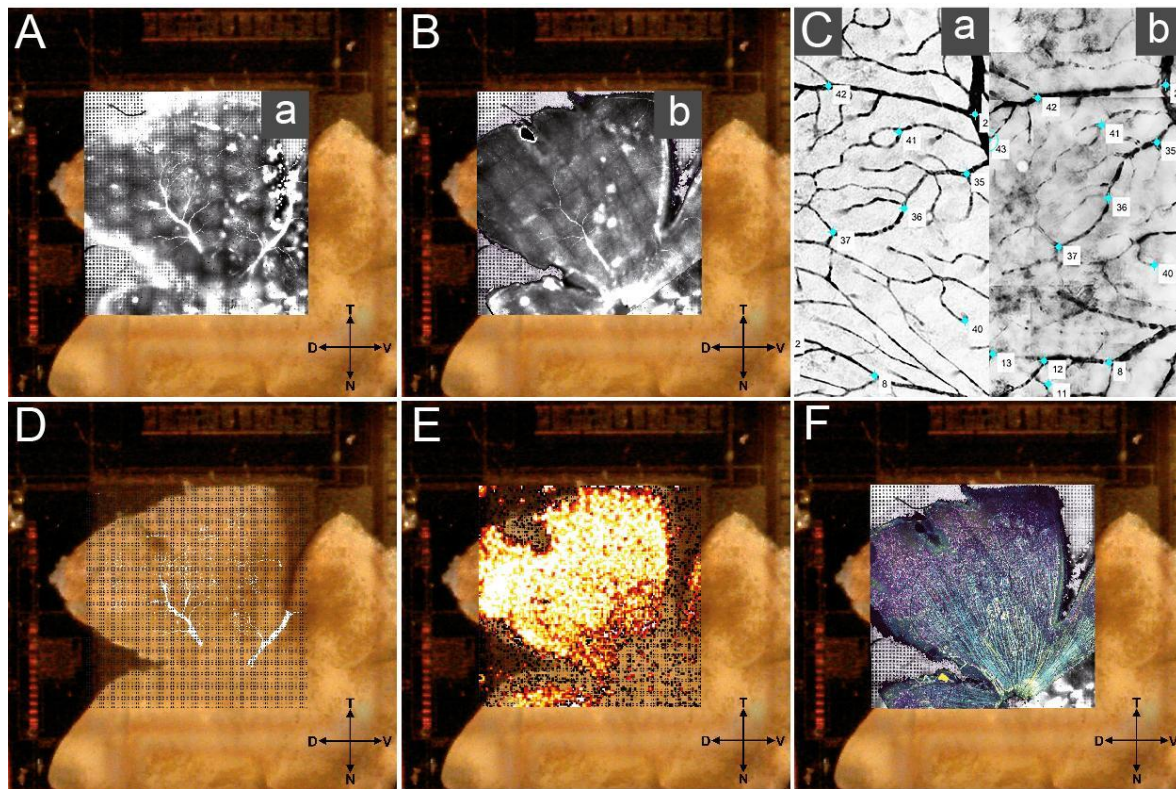

*Figure 8: Registering spike location with cell labelling using blood vessel landmarks. Control points in the fixed pre-labelled (A) and moving post-labelled (B) blood vessel image were aligned (C, insets a & b from A and B, respectively) and the resulting transformation matrix (D) was fixed aligned with the spike locations (E) and additional immunostainings (F). D = dorsal; V = ventral; N = nasal; T = temporal; Grid electrode size 2.65 x 2.65 mm*

469 To register RGC activity with IHC, we used pre- and post-labelled blood vessels as reference  
470 markers (Fig. 1). For pre-labelled blood vessel staining, the eye cup was incubated for 1 hr in  
471 aCSF + 5  $\mu$ M Sulforhodamine 101 (SR101, Sigma Aldrich, MO) and afterwards transferred to  
472 aCSF + 0.06  $\mu$ M SR101 for MEA recording procedures. After recording, the weight and the  
473 polyester membrane were carefully removed to expose the retina, and the MEA well rinsed  
474 with aCSF. If the blood vessels were not visible, a 50% Optiprep (Sigma Aldrich, MO) /50%  
475 aCSF solution was used for rinsing and further clearing. The MEA chip was mounted on a  
476 microscope stage (Olympus AX70, CoolLED pE fluorescence) while continuing rinsing every  
477 2-3 min with oxygenated aCSF to ensure the tissue remains healthy throughout the procedure.  
478 The best stained blood vessel layer (either superficial or deep vascular plexus) was meander-

479 like imaged (Fig. 8 A). For every captured blood vessel, images were acquired in the same  
480 location all the way down to the electrodes as well. Neighbouring images were manually  
481 stitched together in Adobe Photoshop (Adobe, CA) later. The retina was then carefully  
482 removed from the MEA, flattened on a nitrocellulose membrane for IHC procedure. Blood  
483 vessel staining was enhanced by using an anti-mouse secondary antibody in the same  
484 excitation spectrum (normally Alexa568) and blood vessels were imaged again (same plexus  
485 as while the retina was imaged on the MEA (Fig. 8 B). Both blood vessel staining images, pre-  
486 and post-tissue fixation were correlated with each other using the Control Point Selection Tool  
487 in Matlab (Fig. 8 C). Briefly, the images taken in the live retina on the MEA were used as the  
488 fixed (reference) image and images acquired post fixation as the moving image. Minimum 50  
489 reference points were picked for the fixed and moving images to create a geometric  
490 transformation (Matlab *fitgeotrans, lwm, 50*). That geometric transformation was applied to the  
491 GFP image. A stack (hereafter called MEA images) with the MEA electrode image, blood  
492 vessels pre- and post-fixation and GFP image was created in Adobe Photoshop (Fig. 8 F).

493

#### 494 *Registering RGC activity with IHC – Grik4/Scnn1a DREADD RGC identification:*

495 A full protocol for the next steps with code and example data will be made publically available  
496 on our GitHub repository ([https://github.com/GerritHilgen/DREADD\\_RGCclass](https://github.com/GerritHilgen/DREADD_RGCclass)). Briefly, units  
497 that did show a significant change in spontaneous firing rate (sampled during at least 5 min)  
498 before and after adding CNO to the chamber were selected for Grik4/Scnn1a RGC  
499 identification and response clustering. Units with >50% change in firing rate in CNO were  
500 considered as potential Grik4/Scnn1a candidates. We also used the Burst Index (33) to look  
501 at potential changes in activity levels induced by CNO, with potential Grik4/Scnn1a cells  
502 having changes in their Burst Index exceeding > 50%. This is followed by correlating the  
503 physical position of these identified RGCs with micrographs of DREADD-GFP expressing cells  
504 in the GCL. During the spike sorting process with Herdingspikes2, the physical x and y spike  
505 coordinates for each detected spike from a single RGC unit is calculated. The spike location  
506 coordinates are given for a 64 x64 grid (the electrode layout of our MEA). GFP images were

507 transformed to 8-bit images, a threshold (Matlab *max entropy*) was applied, potential gaps  
508 filled (Matlab *imfill 'holes'*) and binarized (Matlab *bwareaopen 50*). Binary images were  
509 analyzed (Matlab *regionprops*), centroids and diameters for every potential GFP blob were  
510 calculated and the pairwise distance between centroids and spike locations was measured for  
511 all combinations. Both, spike centres and GFP cells, were overlaid.

512

513 *Registering RGC activity with IHC – Grik4/Scnn1a response clustering:*

514 All potential Grik4/Scnn1a RGC units linked to a GFP blob were further analyzed and grouped  
515 according to their response to a chirp stimulus. NB it is a two-factor isolation: 1: the RGC has  
516 to have a change of activity of > 50% and has to be within 60  $\mu\text{m}$  of a DREADD GFP cell. But  
517 before that grouping, cells were pre-classified into motion sensitive (responding preferably to  
518 either direction or orientation of motion) or cells that respond best to static stimuli (full field,  
519 chirp). We calculated the direction (DSI) and orientation (OSI) selectivity index as described  
520 elsewhere and used a cut-off value of 0.33 (16). The trial variability and signal to noise ratio  
521 was calculated (16) for each stationary/non-stationary RGC, and units with a value below the  
522 25<sup>th</sup> percentile were discarded. The chirp responses of the remaining Grik4 and Scnn1a  
523 stationary/non-stationary RGC units were used to establish response groups. We used a  
524 similar approach to calculate the SPIKE distance as described in our earlier work (10). Briefly,  
525 the SPIKE distances were computed using the open-source package PYSPIKE (39). The  
526 pairwise distances between two units were determined by computing the pairwise distances  
527 of all trials of the chirp stimulus. The resulting distance matrix was then clustered with a  
528 hierarchical clustering algorithm (Python, *Scipy library dendrogram*). Matlab and Python  
529 scripts and other extended material will be made available via GitHub.

530

## 531 Acknowledgments

532 This project was funded by the Leverhulme Trust (RPG-2016-315 to ES and BC), by  
533 Newcastle University (Faculty of Medical Sciences Graduate School and Pro-Vice Chancellor

534 Discretionary Fund). We thank Matthias Hennig for help with the SPIKE distance calculations  
535 and Chris Williams who worked on related, unpublished aspects of the project. We also thank  
536 the Bioimaging Unit at Newcastle University for providing excellent service and help for this  
537 project.

538

### 539 Authors' contributions

540 Conceptualization: G.H., E.S., B.C.; Software: G.H. Methodology: G.H., E.S.; Formal Analysis:  
541 G.H., Investigation, G.H., V.K., E.K.; Writing – Original Draft: G.H., E.S., B.C., V.K., E.K.;  
542 Project administration: E.S., B.C.; Funding Acquisition: E.S., B.C.

543

### 544 Legends

545 Figure 1: Grik4 and Scnn1a cells in the GCL are not homogeneously distributed. Whole mount  
546 antibody staining against Grik4 (A) and Scnn1a (B) DREADD GFP were imaged at the level  
547 of the GCL. All stained GFP cells were counted and the densities were calculated and  
548 presented in pseudocolors for 3 Grik4 (C) and Scnn1a (D) retinas. V= ventral, T = temporal,  
549 D = dorsal, N = nasal. Scale bar A, B = 1 mm; Scale bar A, B insets II = 100  $\mu$ m.

550 Figure 2: A large fraction of Grik4 and Scnn1a cells is Parvalbumin positive. Whole mount  
551 antibody staining against Grik4 (A) and Scnn1a (B) DREADD GFP in combination with  
552 Parvalbumin (PV, magenta) revealed that a large fraction of the DREADD cells in the ganglion  
553 cell layer is expressing also Parvalbumin (middle and bottom). Bottom images show DREADD  
554 and PV image layers multiplied, thus revealing colocalised cells. Scale bars = 100  $\mu$ m.

555 Figure 3: Grik4 and Scnn1a DREADD are expressed in multiple RGC types. Vertical sections  
556 of Grik4 and Scnn1a retinas were triple stained A, B) for GFP (cyan), Parvalbumin (magenta)  
557 and Calretinin (yellow) or C, D) GFP (cyan) and RBPMS (magenta). INL = inner nuclear layer,  
558 IPL = inner plexiform layer, GCL = ganglion cell layer. Scale bar in B, D = 20  $\mu$ m.

559 Figure 4: Registering GFP RGCs with nearby isolated spike centre clusters to unequivocally  
560 isolate DREADD RGCs. Activation of DREADD ACs can lead to different scenarios in RGC  
561 activities (A). DREADDs in RGCs can be activated with Clozapine N-oxide (CNO) and lead to  
562 an increase in firing frequency (B, left) and sometimes also in bursting activity (B, right).  
563 Vertical lines represent spike times plotted as a function of time. The interpolation of spike  
564 amplitudes from the same RGC defines the potential electrical source location of the isolated  
565 RGCs (C, left). Micrographs of DREADD-GFP expressing cells in the GCL were aligned with  
566 the MEA grid (C, middle). Spike centres from RGCs that showed an increase in activity and  
567 near GFP labelled RGCs were registered as potential DREADD-expressing RGCs (C, right).

568 Figure 5: Defining suitable thresholds to isolate DREADD RGCs. The Euclidian distances from  
569 all spike cluster centres within a radius of 200  $\mu\text{m}$  to a Grik4 (A) or Scnn1a (B) GFP cell are  
570 plotted as a function of their RGC spiking/bursting change (higher value). Red dots represent  
571 RGCs clusters that exceeded the 50% RGC activity change threshold. The y-axis distribution  
572 curve is summarising blue and red dots (magenta). The x-axis distribution curve is separating  
573 red and blue dots. FWHM = full width at half maximum. C) RGC units that were physically  
574 located within a 60  $\mu\text{m}$  radius AND exhibited at least 50% increase in spiking or bursting rate  
575 were defined as DREADD RGCs (Match). White circles represent RGC units that did fall into  
576 the set criteria (No match). D) The steps are applied to all GFP cells. NB the recording area is  
577 generally not completely covering the entire 64 x 64 array i.e., covering all GFP cells.

578 Figure 6: Clustering of Grik4 stationary and non-stationary RGC responses. RGC responses  
579 that showed a high spike train similarity for a chirp stimulus (B, F) were grouped together using  
580 gap statistics (A). For each RGC of the groups, the PSTH was calculated and the mean Chirp  
581 PSTH was plotted (B, G, coloured lines) together with their mean PSTH to a black-white  
582 contrast step (C, H). The means for Bias Index (D, E, I), Response Duration (D), Baseline  
583 Spiking (E), Burst change (F), Spike Rate change (F) and orientation selectivity index (OSI, I)  
584 index were scatter plotted and their standard deviations were used as the circle diameters.

585 Figure 7: Clustering of Scnn1a stationary and non-stationary RGC responses. RGC responses  
586 that showed a high spike train similarity for a chirp stimulus (B, G) and black-white contrast  
587 (C, H) were grouped together using gap statistics (A). For each RGC of the groups, the PSTH  
588 was calculated and the mean PSTH was plotted (B, C, G, H, colored lines). The means for  
589 Bias Index (D, E, F), Response Duration (D), Baseline Spiking (E), Burst change (F), Spike  
590 Rate change (F) and orientation selectivity index (OSI, I) index were scatter plotted and their  
591 standard deviations were used as the circle diameters.

592 Figure 8: Registering spike location with cell labelling using blood vessel landmarks. Control  
593 points in the fixed pre-labelled (A) and moving post-labelled (B) blood vessel image were  
594 aligned (C, insets a & b from A and B, respectively) and the resulting transformation matrix  
595 (D) was fixed aligned with the spike locations (E) and additional immunostainings (F). D =  
596 dorsal; V = ventral; N = nasal; T = temporal; Grid electrode size 2.65 x 2.65 mm

597 Table 1: Summary of Grik4 RGC types with cross-reference to known types

598 Table 2: Summary of Scnn1a RGC types with cross-reference to known types

599

## 600 References

- 601 1. Euler T, Haverkamp S, Schubert T, Baden T. Retinal bipolar cells: elementary building  
602 blocks of vision. *Nat Rev Neurosci*. 2014;15(8):507–19.
- 603 2. Curcio CA, Allen KA. Topography of ganglion cells in human retina. Vol. 300, *The*  
604 *Journal of Comparative Neurology*. 1990. p. 5–25.
- 605 3. Jeon C-J, Strettoi E, Masland RH. The Major Cell Populations of the Mouse Retina.  
606 *Journal of Neuroscience*. 1998;18(21):8936–46.
- 607 4. Masland RH. The fundamental plan of the retina. *Nat Neurosci*. 2001;4(9):877–86.
- 608 5. Baden T, Berens P, Franke K, Román Rosón M, Bethge M, Euler T. The functional  
609 diversity of retinal ganglion cells in the mouse. *Nature*. 2016;529(7586):345–50.
- 610 6. Tran NM, Shekhar K, Whitney IE, Jacobi A, Benhar I, Hong G, et al. Single-Cell Profiles  
611 of Retinal Ganglion Cells Differing in Resilience to Injury Reveal Neuroprotective Genes.  
612 *Neuron*. 2019;104(6):1039-1055.e12.
- 613 7. Coombs J, van der List D, Wang G-Y, Chalupa LM. Morphological properties of mouse  
614 retinal ganglion cells. *Neuroscience*. 2006 Jun;140(1):123–36.

- 615 8. Völgyi B, Chheda S, Bloomfield SA. Tracer coupling patterns of the ganglion cell  
616 subtypes in the mouse retina. *J Comp Neurol*. 2009 Feb;512(5):664–87.
- 617 9. Zeck GM, Masland RH. Spike train signatures of retinal ganglion cell types. *Eur J*  
618 *Neurosci*. 2007;26(2):367–80.
- 619 10. Jouty J, Hilgen G, Sernagor E, Hennig MH. Non-parametric physiological classification  
620 of retinal ganglion cells in the mouse retina. *Front Cell Neurosci* [Internet].  
621 2018;12(December). Available from: <http://dx.doi.org/10.3389/fncel.2018.00481>
- 622 11. Sanes JR, Masland RH. The Types of Retinal Ganglion Cells: Current Status and  
623 Implications for Neuronal Classification. *Annu Rev Neurosci*. 2015;38(1):221–46.
- 624 12. Rheaume BA, Jereen A, Bolisetty M, Sajid MS, Yang Y, Renna K, et al. Single cell  
625 transcriptome profiling of retinal ganglion cells identifies cellular subtypes. *Nat Commun*.  
626 2018 Jul;9(1):2759.
- 627 13. Martersteck EM, Hirokawa KE, Evarts M, Bernard A, Duan X, Li Y, et al. Diverse Central  
628 Projection Patterns of Retinal Ganglion Cells. *Cell Rep*. 2017;18(8):2058–72.
- 629 14. Laboissonniere LA, Goetz JJ, Martin GM, Bi R, Lund TJS, Ellson L, et al. Molecular  
630 signatures of retinal ganglion cells revealed through single cell profiling. *Sci Rep*. 2019  
631 Oct;9(1):15778.
- 632 15. Marblestone\* AH, Zamft\* BM, Maguire YG, Shapiro MG, Cybulski TR, Glaser JI, et al.  
633 Physical principles for scalable neural recording. *Front Comput Neurosci*. 2013;7.
- 634 16. Hilgen G, Pirmoradian S, Pamplona D, Kornprobst P, Cessac B, Hennig MH, et al. Pan-  
635 retinal characterisation of Light Responses from Ganglion Cells in the Developing  
636 Mouse Retina. *Sci Rep* [Internet]. 2017;7. Available from:  
637 <http://dx.doi.org/10.1038/srep42330>
- 638 17. Portelli G, Barrett JM, Hilgen G, Masquelier T, Maccione A, Di Marco S, et al. Rank  
639 Order Coding: a Retinal Information Decoding Strategy Revealed by Large-Scale  
640 Multielectrode Array Retinal Recordings. *eNeuro*. 2016 May;3(3).
- 641 18. Nakazawa K, Quirk MC, Chitwood RA, Watanabe M, Yeckel MF, Sun LD, et al.  
642 Requirement for hippocampal CA3 NMDA receptors in associative memory recall.  
643 *Science*. 2002 Jul;297(5579):211–8.
- 644 19. Madisen L, Zwingman TA, Sunkin SM, Oh SW, Zariwala HA, Gu H, et al. A robust and  
645 high-throughput Cre reporting and characterization system for the whole mouse brain.  
646 *Nat Neurosci*. 2010 Jan;13(1):133–40.
- 647 20. Armbruster BN, Li X, Pausch MH, Herlitze S, Roth BL. Evolving the lock to fit the key to  
648 create a family of G protein-coupled receptors potentially activated by an inert ligand. *Proc*  
649 *Natl Acad Sci U S A*. 2007 Mar;104(12):5163–8.
- 650 21. Roth BL. DREADDs for Neuroscientists. *Neuron*. 2016;89(4):683–94.
- 651 22. Urban DJ, Roth BL. DREADDs (Designer Receptors Exclusively Activated by Designer  
652 Drugs): Chemogenetic Tools with Therapeutic Utility. *Annu Rev Pharmacol Toxicol*.  
653 2015;55(1):399–417.
- 654 23. Zhu H, Aryal DK, Olsen RHJ, Urban DJ, Swearingen A, Forbes S, et al. Cre-dependent  
655 DREADD (Designer Receptors Exclusively Activated by Designer Drugs) mice.  
656 *Genesis*. 2016 Aug;54(8):439–46.

- 657 24. Yi C-W, Yu S-H, Lee E-S, Lee J-G, Jeon C-J. Types of parvalbumin-containing  
658 retinotectal ganglion cells in mouse. *Acta Histochem Cytochem.* 2012;45(3):201–10.
- 659 25. Lee E-S, Lee J-Y, Jeon C-J. Types and density of calretinin-containing retinal ganglion  
660 cells in mouse. *Neurosci Res.* 2010 Feb;66(2):141–50.
- 661 26. Rodriguez AR, de Sevilla Müller LP, Brecha NC. The RNA binding protein RBPMS is a  
662 selective marker of ganglion cells in the mammalian retina. *J Comp Neurol.*  
663 2014;522(6):1411–43.
- 664 27. Kovács-Öller T, Szarka G, Tengölics ÁJ, Ganczer A, Balogh B, Szabó-Meleg E, et al.  
665 Spatial Expression Pattern of the Major Ca-Buffer Proteins in Mouse Retinal Ganglion  
666 Cells. *Cells.* 2020 Mar;9(4).
- 667 28. Münch T a., da Silveira RA, Siegert S, Viney TJ, Awatramani GB, Roska B. Approach  
668 sensitivity in the retina processed by a multifunctional neural circuit. *Nat Neurosci.*  
669 2009;12(10):1308–16.
- 670 29. Drinnenberg A, Franke F, Morikawa RK, Jüttner J, Hillier D, Hantz P, et al. How Diverse  
671 Retinal Functions Arise from Feedback at the First Visual Synapse. *Neuron.* 2018  
672 Jul;99(1):117-134.e11.
- 673 30. Rouso DL, Qiao M, Kagan RD, Yamagata M, Palmiter RD, Sanes JR. Two Pairs of ON  
674 and OFF Retinal Ganglion Cells Are Defined by Intersectional Patterns of Transcription  
675 Factor Expression. *Cell Rep.* 2016 May;15(9):1930–44.
- 676 31. Hilgen G, Lockwood E, Ratcliff JEJ, Sernagor E. Pan-retinal characterization of  
677 parvalbumin-calretinin co-expressing cells in the mouse retina. *F1000Res.* 2019 Sep;8.
- 678 32. de Vries SEJ, Baccus SA, Meister M. The Projective Field of a Retinal Amacrine Cell.  
679 *Journal of Neuroscience.* 2011;31(23):8595–604.
- 680 33. Jones TA, Leake PA, Snyder RL, Stakhovskaya O, Bonham B. Spontaneous discharge  
681 patterns in cochlear spiral ganglion cells before the onset of hearing in cats. *J*  
682 *Neurophysiol.* 2007;98(4):1898–908.
- 683 34. Muthmann J-O, Amin H, Sernagor E, Maccione A, Panas D, Berdondini L, et al. Spike  
684 Detection for Large Neural Populations Using High Density Multielectrode Arrays. *Front*  
685 *Neuroinform.* 2015;9(December):1–21.
- 686 35. Hilgen G, Sorbaro M, Pirmoradian S, Muthmann JO, Kepiro IE, Ullo S, et al.  
687 Unsupervised Spike Sorting for Large-Scale, High-Density Multielectrode Arrays. *Cell*  
688 *Rep.* 2017;18(10):2521–32.
- 689 36. Verbist C, Müller MG, Mansvelder HD, Legenstein R, Giugliano M. The location of the  
690 axon initial segment affects the bandwidth of spike initiation dynamics. *PLoS Comput*  
691 *Biol.* 2020 Jul;16(7):e1008087.
- 692 37. Colbert CM, Johnston D. Axonal action-potential initiation and Na<sup>+</sup> channel densities in  
693 the soma and axon initial segment of subicular pyramidal neurons. *J Neurosci.* 1996  
694 Nov;16(21):6676–86.
- 695 38. Kreuz T, Chicharro D, Houghton C, Andrzejak RG, Mormann F. Monitoring spike train  
696 synchrony. *J Neurophysiol.* 2013 Mar;109(5):1457–72.
- 697 39. PySpike—A Python library for analyzing spike train synchrony. *SoftwareX.* 2016 Jan  
698 1;5:183–9.



- 699 40. Tibshirani R, Walther G, Hastie T. Estimating the number of clusters in a data set via the  
700 gap statistic. *J R Stat Soc Series B Stat Methodol.* 2001;63(2):411–23.
- 701 41. Farrow K, Teixeira M, Szikra T, Viney TJ, Balint K, Yonehara K, et al. Ambient  
702 illumination toggles a neuronal circuit switch in the retina and visual perception at cone  
703 threshold. *Neuron.* 2013 Apr 24;78(2):325–38.
- 704 42. Li PH, Gauthier JL, Schiff M, Sher A, Ahn D, Field GD, et al. Anatomical Identification of  
705 Extracellularly Recorded Cells in Large-Scale Multielectrode Recordings. *Journal of*  
706 *Neuroscience.* 2015;35(11):4663–75.
- 707 43. Pisano F, Zampaglione E, McAlinden N, Roebber J, Dawson MD, Mathieson K, et al.  
708 Large scale matching of function to the genetic identity of retinal ganglion cells. *Sci Rep.*  
709 2017;7(1):1–12.
- 710 44. Ivanova E, Hwang GS, Pan ZH. Characterization of transgenic mouse lines expressing  
711 Cre recombinase in the retina. *Neuroscience.* 2010;165(1):233–43.
- 712 45. Rivlin-Etzion M, Zhou K, Wei W, Elstrott J, Nguyen PL, Barres BA, et al. Transgenic  
713 mice reveal unexpected diversity of on-off direction-selective retinal ganglion cell  
714 subtypes and brain structures involved in motion processing. *Journal of Neuroscience.*  
715 2011;31(24):8760–9.
- 716 46. Johnson KP, Zhao L, Kerschensteiner D. A Pixel-Encoder Retinal Ganglion Cell with  
717 Spatially Offset Excitatory and Inhibitory Receptive Fields. *Cell Rep.* 2018;22(6):1462–  
718 72.
- 719 47. Krieger B, Qiao M, Rousso DL, Sanes JR, Meister M. Four alpha ganglion cell types in  
720 mouse retina: Function, structure, and molecular signatures. *PLoS One.* 2017;12(7):1–  
721 21.
- 722 48. Deny S, Ferrari U, Macé E, Yger P, Caplette R, Picaud S, et al. Multiplexed  
723 computations in retinal ganglion cells of a single type. *Nat Commun.* 2017  
724 Dec;8(1):1964.
- 725 49. Storchi R, Milosavljevic N, Eleftheriou CG, Martial FP, Orłowska-Feuer P, Bedford RA,  
726 et al. Melanopsin-driven increases in maintained activity enhance thalamic visual  
727 response reliability across a simulated dawn. *Proceedings of the National Academy of*  
728 *Sciences.* 2015 Oct;112(42):E5734–43.
- 729 50. Song AJ, Palmiter RD. Detecting and Avoiding Problems When Using the Cre-lox  
730 System. *Trends Genet.* 2018 May;34(5):333–40.
